# Supplementary material
Source: Springer Nature journal article supplement (https://www.springermedizin.de/resource/supplementary/12937_2011_436_MOESM1_ESM.pdf/25653108)

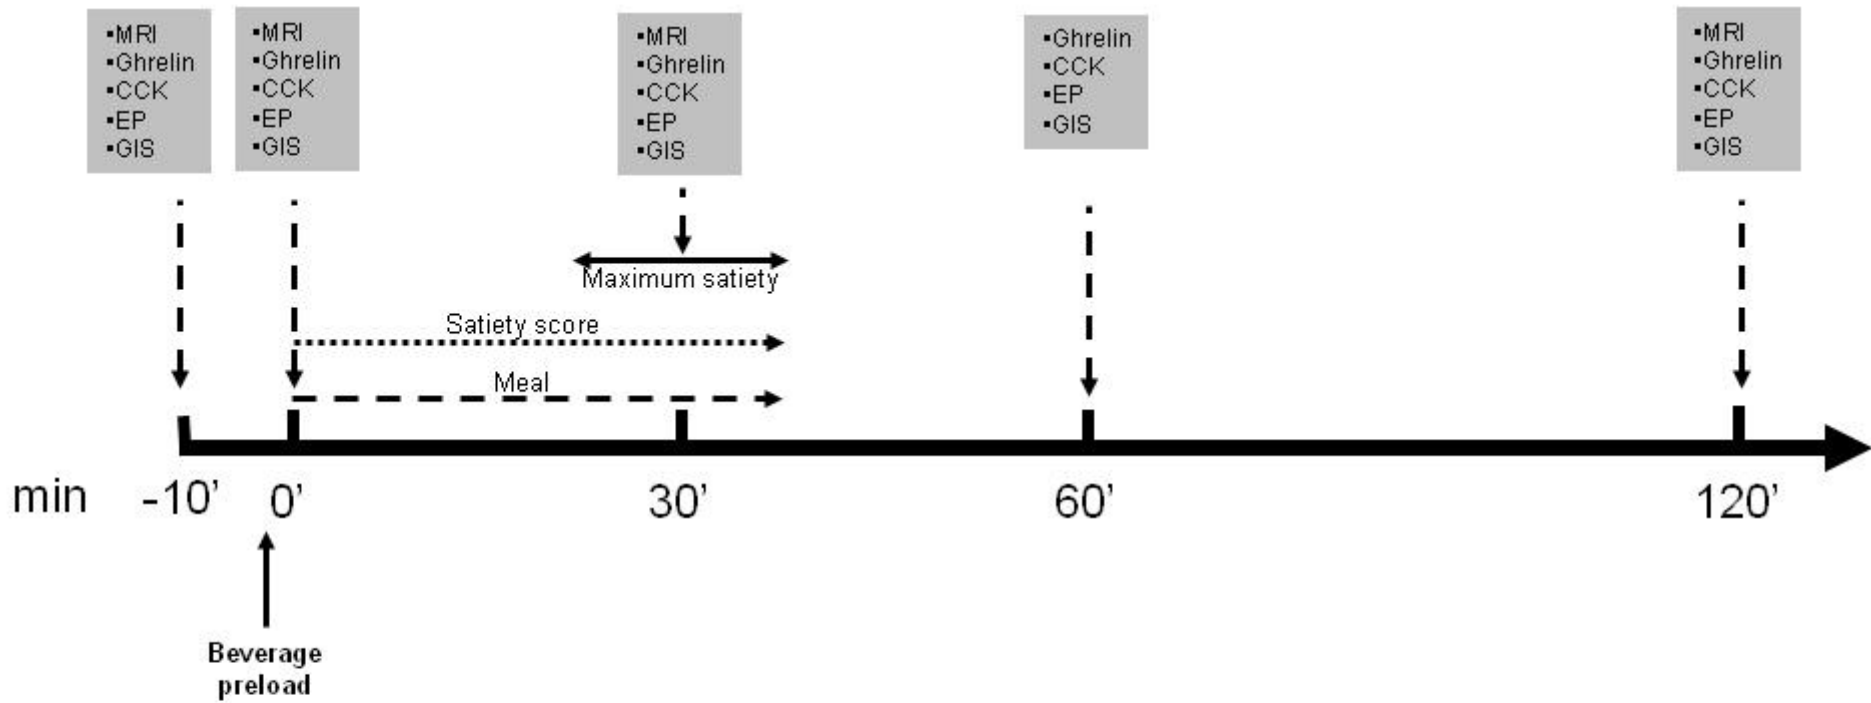

Supplement: MOESM1 [file 25653108]
